# Supplementary material for: Black tea increases hypertonic stress resistance inC. elegans
Source: Royal Society of Chemistry journal article supplement (doi:10.1039/c7fo02017a), 2018-01-01
Supplement: c7fo02017a1.pdf [file c7fo02017a1.pdf]

## Supplemental Figure Legends and tables

Fig. s1, Flow chart showing the different stages in the manufacture of the green tea and black tea.

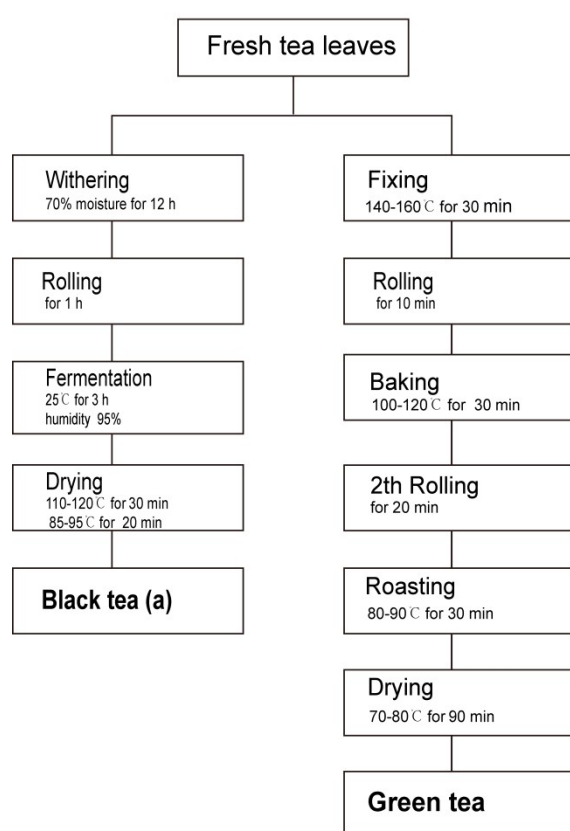

Table S1, List of primers used for the quantitative real-time reverse transcription-polymerase chain reaction.

| Genes         | Primers | Sequence (5'→3')      |
|---------------|---------|-----------------------|
| <i>ama-1</i>  | Forward | CTGACCCAAAGAACACGGTGA |
|               | Reverse | TCCAATTCGATCCGAAGAAGC |
| <i>nsy-1</i>  | Forward | CTCAGTTTGGTGGAGGGAAC  |
|               | Reverse | AGGCTTTCACGGTCTTCGTA  |
| <i>sek-1</i>  | Forward | GCGAAGGTGATGTCTGGATT  |
|               | Reverse | TTCCCAATAAACGGCTCTG   |
| <i>unc-43</i> | Forward | ATCTGGGCTTGTGGTGTCAT  |
|               | Reverse | GGCTCGGGTAATCATAGGC   |
| <i>pmk-1</i>  | Forward | TCCGACTCCACGAGAAGGAT  |
|               | Reverse | CCGAGCGAGTACATTCAGCA  |
| <i>wnk-1</i>  | Forward | GGAGTATCACACTCGGCTTCA |
|               | Reverse | GGTTGTTGTGCCAATCGCAT  |
| <i>gck-3</i>  | Forward | GTTGCAGTGA ACTATCGGAC |
|               | Reverse | GTCTCGATACTCACCACCTT  |

Table S2, Chemical compositions of green tea extract and black tea extract.

|                                  | GTE           | BTE           |
|----------------------------------|---------------|---------------|
| <b>Total polyphenols</b>         | 310.86 ± 2.35 | 160.09 ± 2.29 |
| Epigallocatechin (EGC)           | 22.63 ± 1.85  | 6.96 ± 0.14   |
| Catechin (DL-C)                  | 14.28 ± 0.18  | 6.24 ± 0.44   |
| Epicatechin (EC)                 | 10.84 ± 0.36  | 4.10 ± 0.05   |
| Epigallocatechin gallate (EGCG)  | 142.22 ± 3.06 | 4.21 ± 0.03   |
| Gallocatechin gallate (GCG)      | 29.82 ± 0.82  | ND            |
| Epicatechin gallate (ECG)        | 39.54 ± 0.65  | 2.59 ± 0.07   |
| Theaflavin (TF)                  | ND            | 0.34 ± 0.02   |
| Theaflavin-3-gallate (TF-3-G)    | ND            | 0.50 ± 0.02   |
| Theaflavin-3'-gallate (TF-3'-G)  | ND            | 0.37 ± 0.05   |
| Theaflavin-3,3'-digallate (TFDG) | ND            | 1.31 ± 0.19   |
| Gallic acid (GA)                 | 4.09 ± 0.025  | 18.69 ± 0.10  |
| <b>Total purine alkaloids</b>    | 102.99 ± 0.35 | 116.89 ± 0.29 |
| Caffeine                         | 96.58 ± 0.29  | 113.46 ± 0.29 |
| Theobromine                      | 6.23 ± 0.047  | 2.88 ± 0.04   |
| Theophylline                     | 0.18 ± 0.03   | 0.55 ± 0.03   |
| <b>Total amino acids</b>         | 82.45 ± 3.49  | 105.27 ± 3.23 |
| Theanine                         | 45.99 ± 0.34  | 45.26 ± 1.73  |

### Chemical compositions of green tea extract and black tea extract (mg.g<sup>-1</sup>)

Note: ND, not detected.

The methods used to quantify compositions were described previously (Xiong et al., 2014).

#### Supplementary Reference

Xiong, L. G., Huang, J. A., Li, J., Yu, P. H., Xiong, Z., Zhang, J. W., . . . Chen, J. H. (2014). Black Tea Increased Survival of *Caenorhabditis elegans* under Stress. *Journal of Agricultural and Food Chemistry*, 62(46), 11163-11169. doi: 10.1021/jf503120j
